# Supplementary material for: Hospital Strategy Uptake and Reductions in Unplanned Readmission Rates for Patients with Heart Failure: A Prospective Study
Source: PubMed Central journal article supplement (PMC4395590; doi:10.1007/s11606-014-3105-5), 2014-12-19
Supplement: 11606_2014_3105_MOESM1_ESM.pdf [file 11606_2014_3105_MOESM1_ESM.pdf]

**Note: All questions refer to patients with acute myocardial infarction (AMI) or heart failure (HF).**  
Please reflect upon your hospital's quality improvement efforts that are **CURRENTLY** in place

## **STAAR Evaluation Survey Instructions**

### **Follow-up Survey Summer 2013**

**This survey typically takes about 20 minutes to complete.** Please note the following:

- **Finish Later** – If unable to complete the survey in a single session, you may save your answers by clicking the "**Finish Later**" button located at the bottom of each page. You may return to your survey as many times as needed using your ID and password until you complete the survey.
- **Logging Out** - The survey will automatically log you out if left open and idle for more than 30 minutes. You will be required to log back in. Your answers on completed pages of the survey will be saved, but answers on the survey page left open will not be saved and will require re-entry. We suggest using the "Finish Later" button if you need to leave the survey idle for more than 30 minutes.
- **Submit Survey** - When you are satisfied that your survey is complete, click the "**Complete**" button located on the bottom of the last page. Once completed, you will not be able to return to your survey.
- **Discussion and Collaboration** – To help answer questions, please feel free to consult with others at your hospital.

If you would like to preview the survey questions before proceeding, click on "**Preview Survey**", located in the left column of the Survey Home page. **We are available to assist you at 203-737-6114 or email (Marcia. mulligan@yale.edu) with questions or difficulties.**

**Thank you very much for your time and participation!**

**Note: All questions refer to patients with acute myocardial infarction (AMI) or heart failure (HF).**  
Please reflect upon your hospital's quality improvement efforts that are **CURRENTLY** in place

**I. Organizational support and quality improvement (QI) efforts for reducing readmission rates**

1. Reducing preventable readmissions is a written objective for your hospital.

Strongly agree     Agree     Not sure     Disagree     Strongly disagree

2a. Does your hospital have any quality improvement teams devoted to reducing preventable readmissions for patients with heart failure (HF)?

YES     NO  
*If "No", please skip to #3a*

2b. Please indicate who belongs to the quality improvement (QI) team devoted to reducing readmission rates among patients with HF:

|                                                          | <b>QI team members focusing on readmission for patients with HF</b> |    |            |
|----------------------------------------------------------|---------------------------------------------------------------------|----|------------|
|                                                          | Yes                                                                 | No | Don't know |
| a. Senior management of the hospital - HF                |                                                                     |    |            |
| b. Hospital governing board members - HF                 |                                                                     |    |            |
| c. Physicians - HF                                       |                                                                     |    |            |
| d. Advanced practice nurses or physician assistants - HF |                                                                     |    |            |
| e. Nurses - HF                                           |                                                                     |    |            |
| f. Pharmacists - HF                                      |                                                                     |    |            |
| g. Social workers and/or case managers - HF              |                                                                     |    |            |
| h. Quality improvement/Quality management staff - HF     |                                                                     |    |            |
| i. Patient or family representatives - HF                |                                                                     |    |            |
| j. Others, specify: _____                                |                                                                     |    |            |

3a. Does your hospital have any quality improvement teams devoted to reducing preventable readmissions for patients with acute myocardial infarction (AMI)?

YES     NO  
*If "No", please skip to #4*

**Note: All questions refer to patients with acute myocardial infarction (AMI) or heart failure (HF).**

Please reflect upon your hospital's quality improvement efforts that are **CURRENTLY** in place

3b. Please indicate who belongs to the quality improvement (QI) team devoted to reducing readmission rates among patients with AMI:

|                                                           | QI team members focusing on readmission for patients with AMI |    |            |
|-----------------------------------------------------------|---------------------------------------------------------------|----|------------|
|                                                           | Yes                                                           | No | Don't know |
| a. Senior management of the hospital - AMI                |                                                               |    |            |
| b. Hospital governing board members - AMI                 |                                                               |    |            |
| c. Physicians - AMI                                       |                                                               |    |            |
| d. Advanced practice nurses or physician assistants - AMI |                                                               |    |            |
| e. Nurses - AMI                                           |                                                               |    |            |
| f. Pharmacists - AMI                                      |                                                               |    |            |
| g. Social workers and/or case managers - AMI              |                                                               |    |            |
| h. Quality improvement/Quality management staff - AMI     |                                                               |    |            |
| i. Patient or family representatives - AMI                |                                                               |    |            |
| j. Others, specify: _____                                 |                                                               |    |            |

## II. Participation in readmission collaboratives or campaigns

4. Please indicate if your hospital participates in each of the following collaboratives or campaigns, and if so, to what extent.

*4a. State Action on Avoidable Rehospitalizations/Institute for Healthcare Improvement (STAAR)/(IHI)*

- Yes, regularly participates
- Yes, occasionally or seldom participates
- No, does not participate
- Don't know

*4b. Interventions to reduce acute care transfers (INTERACT)*

- Yes, regularly participates
- Yes, occasionally or seldom participates
- No, does not participate
- Don't know

*4c. Centers for Medicare & Medicaid/Quality Improvement Organizations Care Transitions Project*

- Yes, regularly participates
- Yes, occasionally or seldom participates
- No, does not participate
- Don't know

**Note: All questions refer to patients with acute myocardial infarction (AMI) or heart failure (HF).**

Please reflect upon your hospital's quality improvement efforts that are **CURRENTLY** in place

*4d. Better Outcomes for Older Adults through Safe Transitions (BOOST)/Society for Hospitalist Medicine*

- Yes, regularly participates
- Yes, occasionally or seldom participates
- No, does not participate
- Don't know

*4e. Project Reengineered Discharge (RED)*

- Yes, regularly participates
- Yes, occasionally or seldom participates
- No, does not participate
- Don't know

*4f. Hospital-to-Home (H2H)*

- Yes, regularly participates
- Yes, occasionally or seldom participates
- No, does not participate
- Don't know

*4g. Care Transitions Intervention (Coleman)*

- Yes, regularly participates
- Yes, occasionally or seldom participates
- No, does not participate
- Don't know

*4h. Transitional Care Model (Naylor)*

- Yes, regularly participates
- Yes, occasionally or seldom participates
- No, does not participate
- Don't know

*4i. University Health Systems Consortium collaborative*

- Yes, regularly participates
- Yes, occasionally or seldom participates
- No, does not participate
- Don't know

**Note: All questions refer to patients with acute myocardial infarction (AMI) or heart failure (HF).**  
Please reflect upon your hospital's quality improvement efforts that are **CURRENTLY** in place

4j. *State hospital association collaborative*

- Yes, regularly participates
- Yes, occasionally or seldom participates
- No, does not participate
- Don't know

4k. *Local or regional collaborative*

- Yes, regularly participates
- Yes, occasionally or seldom participates
- No, does not participate
- Don't know

4l. *Others (please specify)* \_\_\_\_\_

### III. Systems to reduce readmissions

#### IN-HOSPITAL CARE

5. During a patient's hospitalization, is the risk of death estimated in any formal way and also used in clinical care?

- YES       NO

5a. *If Yes, how?* \_\_\_\_\_

6. During a patient's hospitalization, is the risk of readmission estimated in any formal way and also used in clinical care?

- YES       NO

6a. *If Yes, how?* \_\_\_\_\_

7. Does your hospital have a multidisciplinary team to manage the care of patients who are at high risk of readmission?

- YES       NO

8. Does your hospital have a reliable process in place to identify patients with heart failure at the time they are admitted?

- YES       NO

**Note: All questions refer to patients with acute myocardial infarction (AMI) or heart failure (HF).**  
Please reflect upon your hospital's quality improvement efforts that are **CURRENTLY** in place

9. Does your hospital have a reliable process in place to identify patients with AMI at the time they are admitted?

YES       NO

10. What proportion of your patients with AMI has a cardiologist involved in their care?

ALL       MOST       SOME       NONE

11. What proportion of your patients with HF has a cardiologist involved in their care?

ALL       MOST       SOME       NONE

### **MEDICATION RECONCILIATION**

12. How often does each of the following occur as part of the medication reconciliation process at your hospital?

*12a. Emergency medicine staff obtains medication history*

ALWAYS       USUALLY       SOMETIMES       NEVER

*12b. Admitting medical team obtains medication history*

ALWAYS       USUALLY       SOMETIMES       NEVER

*12c. Pharmacist or pharmacy technician obtains medication history*

ALWAYS       USUALLY       SOMETIMES       NEVER

*12d. Contact is made with outside pharmacies*

ALWAYS       USUALLY       SOMETIMES       NEVER

*12e. Contact is made with primary physician*

ALWAYS       USUALLY       SOMETIMES       NEVER

*12f. Outpatient and inpatient prescription records are linked electronically*

ALWAYS       USUALLY       SOMETIMES       NEVER

**Note: All questions refer to patients with acute myocardial infarction (AMI) or heart failure (HF).**

Please reflect upon your hospital's quality improvement efforts that are **CURRENTLY** in place

*12g. We subscribe to third party prescription database that provides historical fill and refill information (e.g., Health Care Systems)*

ALWAYS       USUALLY       SOMETIMES       NEVER

13. What tools are in place to facilitate medication reconciliation at your hospital?  
**(Check all that apply)**

- Paper-based standardized form
- Web-based tool
- Form/tool built into electronic medical record
- No standardized form or tool is used for medication reconciliation
- Other, please specify \_\_\_\_\_

14. Who is responsible for conducting medication reconciliation at discharge?

*14a. Discharging physician*

ALWAYS       USUALLY       SOMETIMES       NEVER

*14b. Physician assistant or nurse practitioner*

ALWAYS       USUALLY       SOMETIMES       NEVER

*14c. Nurse*

ALWAYS       USUALLY       SOMETIMES       NEVER

*14d. Pharmacist*

ALWAYS       USUALLY       SOMETIMES       NEVER

*14e. Responsibility is not formally assigned*

ALWAYS       USUALLY       SOMETIMES       NEVER

*14f. Other (specify): \_\_\_\_\_*

15. Is it a component of the discharge process to ask patients whether they can afford their medications?

- Yes, for all patients
- Yes, for some patients and/or for certain medications
- No, not routine

**Note: All questions refer to patients with acute myocardial infarction (AMI) or heart failure (HF).**

Please reflect upon your hospital's quality improvement efforts that are **CURRENTLY** in place

16. How often are your patients discharged from the hospital with their new medications in hand?

ALWAYS       USUALLY       SOMETIMES       NEVER

### **PATIENT/FAMILY EDUCATION**

17. Does your hospital promote the use of teach-back techniques (having the patient “teach” new information back to the educator) for patient and family education?

YES       NO

18. What proportion of PATIENTS OR THEIR CAREGIVERS receives each of the following in written form at the time of discharge?

*18a. Discharge instructions*

ALL       MOST       SOME       NONE

*18b. Discharge summary*

ALL       MOST       SOME       NONE

*18c. Educational information about heart failure, when relevant*

ALL       MOST       SOME       NONE

*18d. Educational information about AMI*

ALL       MOST       SOME       NONE

*18e. Action plan for patients with heart failure to help them manage changes in condition*

ALL       MOST       SOME       NONE

*18f. Personal health record (e.g., list of diagnoses, allergies, medications, physicians, contact information)*

ALL       MOST       SOME       NONE

*18g. Names, doses, and frequency of all discharge medications*

ALL       MOST       SOME       NONE



**Note: All questions refer to patients with acute myocardial infarction (AMI) or heart failure (HF).**

Please reflect upon your hospital's quality improvement efforts that are **CURRENTLY** in place

18h. *The purpose of each medication*

ALL       MOST       SOME       NONE

18i. *Information about which medications are new*

ALL       MOST       SOME       NONE

18j. *Information about which medications are have changed in dose or frequency*

ALL       MOST       SOME       NONE

18k. *Information about which medications are to be stopped*

ALL       MOST       SOME       NONE

18l. *The signs or symptoms that should prompt and immediate call to a physician or a return to the hospital*

ALL       MOST       SOME       NONE

18m. *Direct contact information for a specific physician to contact in case of emergency*

ALL       MOST       SOME       NONE

18n. *Any other type of emergency plan*

ALL       MOST       SOME       NONE

18o. *Side effects of each medication*

ALL       MOST       SOME       NONE

19. Are all patients screened by a case manager using explicit criteria to identify post-discharge needs?

YES       NO

20. On the day of discharge, do patients leave the hospital with an outpatient follow-up appointment already arranged?

ALWAYS       USUALLY       SOMETIMES       NEVER

**Note: All questions refer to patients with acute myocardial infarction (AMI) or heart failure (HF).**

Please reflect upon your hospital's quality improvement efforts that are **CURRENTLY** in place

21. Is there a reliable process in place to ensure outpatient physicians are alerted to the patient's *admission* within 24 hours of admission?

YES       NO

22. Is there a reliable process in place to ensure outpatient physicians are alerted to the patient's *discharge* within 48 hours of discharge?

YES       NO

23. How quickly is a patient's discharge summary typically completed and available for viewing?

- On discharge
- Within 48 hours of discharge
- Within 7 days
- Within 30 days
- Longer than 30 days
- There are no explicit goals or policies defining a time-frame for completing the discharge summary

24. In what proportion of patients is a paper or electronic discharge summary sent directly to the patient's primary doctor?

ALL       MOST       SOME       NONE

25. What proportion of patients is cared for by outpatient physicians with access to inpatient electronic records?

ALL       MOST       SOME       NONE

26. Is there someone within the hospital assigned to follow up on test results that return after the patient is discharged?

YES       NO

27. Is there a process in place to ensure pending test results are listed in the discharge summary?

YES       NO

## **POST-ACUTE CARE LINKAGES AND SUPPORTS**

28. Has your hospital partnered with community home care agencies and/or skilled nursing facilities to reduce readmission rates?

YES       NO

**Note: All questions refer to patients with acute myocardial infarction (AMI) or heart failure (HF).**

Please reflect upon your hospital's quality improvement efforts that are **CURRENTLY** in place

29. Has your hospital partnered with community physicians or physician groups to reduce readmission rates?

YES       NO

30. Has your hospital partnered with other local hospitals to reduce readmission rates?

YES       NO

31. Does your hospital regularly call patients after discharge to either follow up on post-discharge needs or to provide additional education?

YES       NO

*If "No", please skip to #34*

32. How long after discharge does your hospital regularly call patients?  
**(Check all that apply if multiple calls are made)**

- Within 48 hours of discharge
- Within 1 week of discharge
- Within 2 weeks of discharge
- Within a month of discharge

33. Who conducts the calls? **(Check all that apply)**

- Clerical staff
- Care coordination/social work staff
- Nurses Pharmacist Physician
- Other, specify: \_\_\_\_\_

34. For how many of your patients does your hospital arrange home visits after discharge?

ALL PATIENTS       MOST       SOME       NONE

35. Does your hospital run its own post-discharge clinic in which patients can be seen within 7 days of discharge?

YES       NO

36. For how many of your patients does your hospital arrange telemonitoring after discharge?

ALL PATIENTS       MOST       SOME       NONE

**Note: All questions refer to patients with acute myocardial infarction (AMI) or heart failure (HF).**

Please reflect upon your hospital's quality improvement efforts that are **CURRENTLY** in place

37. How many of your patients with AMI does your hospital refer to cardiac rehabilitation after discharge?

ALL PATIENTS     MOST     SOME     NONE

38. How many of your patients does your hospital enroll in chronic care disease management programs after discharge?

ALL PATIENTS     MOST     SOME     NONE

39. Is there a physician assigned to coordinate with visiting nurse agencies about recently discharged patients in the post-discharge period?

YES     NO

40. For patients discharged with home health services, does your hospital provide direct contact information for a specific inpatient physician to contact in case of questions?

YES     NO

**For the following questions, please consider patients who are transferred to skilled nursing facilities:**

41. Does your hospital conduct a nurse-to-nurse report prior to transfer?

ALWAYS     USUALLY     SOMETIMES     NEVER

42. Does your hospital send a completed discharge summary with the patient?

ALWAYS     USUALLY     SOMETIMES     NEVER

43. Does your hospital send a reconciled medication list with the patient?

ALWAYS     USUALLY     SOMETIMES     NEVER

44. Does your hospital send a medication administration record with the patient?

ALWAYS     USUALLY     SOMETIMES     NEVER

45. Does your hospital provide a direct contact number to reach the inpatient treating physician?

ALWAYS     USUALLY     SOMETIMES     NEVER

**Note: All questions refer to patients with acute myocardial infarction (AMI) or heart failure (HF).**

Please reflect upon your hospital's quality improvement efforts that are **CURRENTLY** in place

#### IV. Measures and tracking

46. Does your hospital have a designated person or group to review unplanned readmissions that occur within 30 days of the original discharge?

YES       NO

*If "No", please skip to #48*

47. How long after the unplanned readmission are cases *typically* reviewed?

- Within one week of the readmission
- Within one month of the readmission
- Within 3 months of the readmission
- Other (please specify) \_\_\_\_\_
- We do not have a set timeframe for reviewing readmissions

48. Which of the following does your hospital track for quality improvement efforts?

|                                                                              |                                                          |
|------------------------------------------------------------------------------|----------------------------------------------------------|
| a. Timeliness of discharge summaries                                         | <input type="checkbox"/> YES <input type="checkbox"/> NO |
| b. Proportion of discharge summaries that are sent to primary physician      | <input type="checkbox"/> YES <input type="checkbox"/> NO |
| c. Percent of patients discharged with a follow-up appointment               | <input type="checkbox"/> YES <input type="checkbox"/> NO |
| d. Percent of patients discharged with a follow-up appointment within 7 days | <input type="checkbox"/> YES <input type="checkbox"/> NO |
| Accuracy of medication reconciliation                                        | <input type="checkbox"/> YES <input type="checkbox"/> NO |
| f. Content of discharge instructions                                         | <input type="checkbox"/> YES <input type="checkbox"/> NO |
| g. 30-day readmission rate                                                   | <input type="checkbox"/> YES <input type="checkbox"/> NO |
| h. Early (<7 day) readmission rate                                           | <input type="checkbox"/> YES <input type="checkbox"/> NO |
| i. Proportion of patients readmitted to another hospital                     | <input type="checkbox"/> YES <input type="checkbox"/> NO |
| j. Other, please specify                                                     | <input type="checkbox"/> YES <input type="checkbox"/> NO |

49. Please indicate your primary role in the hospital, check all that apply:

- Quality improvement, quality management, quality assurance, performance management
- Case management/care coordination/social work/discharge planning
- Cardiology
- Other clinical role
- Other non-clinical role

**Note: All questions refer to patients with acute myocardial infarction (AMI) or heart failure (HF).**  
 Please reflect upon your hospital's quality improvement efforts that are **CURRENTLY** in place

50. We are trying to better understand your professional network. Please list the hospitals that you specifically interact with regularly about efforts to improve the quality of cardiology care.

| HOSPITAL NAME | CITY | STATE | For each hospital, please choose one of the following                              |                                                                                           |      |
|---------------|------|-------|------------------------------------------------------------------------------------|-------------------------------------------------------------------------------------------|------|
|               |      |       | You have provided <b>them</b> with information or tools to improve cardiology care | <b>They</b> have provided <b>you</b> with information or tools to improve cardiology care | Both |
|               |      |       |                                                                                    |                                                                                           |      |
|               |      |       |                                                                                    |                                                                                           |      |
|               |      |       |                                                                                    |                                                                                           |      |
|               |      |       |                                                                                    |                                                                                           |      |

51. What about STAAR has been most useful to your hospital's efforts to reduce readmission rates?

52. How could STAAR improve the impact of H2H on your hospital?

\*Questions deleted from survey on 8.16.13 due to H2H participation.
